# Supplementary material
Source: publisher figshare collection journal article supplement (https://acs.figshare.com/ndownloader/files/5076331)
Supplement: Supplementary file 1 [file 5076331]

  
data_hen39 
  
_audit_creation_method            SHELXL-97 
_chemical_name_systematic 
; 
 ? 
; 
_chemical_name_common             ? 
_chemical_melting_point           ? 
_chemical_formula_moiety          ? 
_chemical_formula_sum 
 'C28 H42 Cl4 N4 Ni4 O9' 
_chemical_formula_weight          955.30 
  
loop_ 
 _atom_type_symbol 
 _atom_type_description 
 _atom_type_scat_dispersion_real 
 _atom_type_scat_dispersion_imag 
 _atom_type_scat_source 
 'C'  'C'   0.0033   0.0016 
 'International Tables Vol C Tables 4.2.6.8 and 6.1.1.4' 
 'H'  'H'   0.0000   0.0000 
 'International Tables Vol C Tables 4.2.6.8 and 6.1.1.4' 
 'N'  'N'   0.0061   0.0033 
 'International Tables Vol C Tables 4.2.6.8 and 6.1.1.4' 
 'O'  'O'   0.0106   0.0060 
 'International Tables Vol C Tables 4.2.6.8 and 6.1.1.4' 
 'Ni'  'Ni'   0.3393   1.1124 
 'International Tables Vol C Tables 4.2.6.8 and 6.1.1.4' 
 'Cl'  'Cl'   0.1484   0.1585 
 'International Tables Vol C Tables 4.2.6.8 and 6.1.1.4' 
  
_symmetry_cell_setting            Tetragonal 
_symmetry_space_group_name_H-M    I-42d 
  
loop_ 
 _symmetry_equiv_pos_as_xyz 
 'x, y, z' 
 '-x, -y, z' 
 'y, -x, -z' 
 '-y, x, -z' 
 '-x+1/2, y, -z+3/4' 
 'x+1/2, -y, -z+3/4' 
 '-y+1/2, -x, z+3/4' 
 'y+1/2, x, z+3/4' 
 'x+1/2, y+1/2, z+1/2' 
 '-x+1/2, -y+1/2, z+1/2' 
 'y+1/2, -x+1/2, -z+1/2' 
 '-y+1/2, x+1/2, -z+1/2' 
 '-x+1, y+1/2, -z+5/4' 
 'x+1, -y+1/2, -z+5/4' 
 '-y+1, -x+1/2, z+5/4' 
 'y+1, x+1/2, z+5/4' 
  
_cell_length_a                    16.1421(6) 
_cell_length_b                    16.1421(6) 
_cell_length_c                    29.4689(14) 
_cell_angle_alpha                 90.00 
_cell_angle_beta                  90.00 
_cell_angle_gamma                 90.00 
_cell_volume                      7678.6(5) 
_cell_formula_units_Z             8 
_cell_measurement_temperature     173(2) 
_cell_measurement_reflns_used     ? 
_cell_measurement_theta_min       ? 
_cell_measurement_theta_max       ? 
  
_exptl_crystal_description        Block 
_exptl_crystal_colour             ? 
_exptl_crystal_size_max           0.20 
_exptl_crystal_size_mid           0.20 
_exptl_crystal_size_min           0.16 
_exptl_crystal_density_meas       ? 
_exptl_crystal_density_diffrn     1.653 
_exptl_crystal_density_method     'not measured' 
_exptl_crystal_F_000              3920 
_exptl_absorpt_coefficient_mu     2.262 
_exptl_absorpt_correction_type    'Multi-scan' 
_exptl_absorpt_correction_T_min   0.6604 
_exptl_absorpt_correction_T_max   0.7136 
_exptl_absorpt_process_details    SADABS 
  
_exptl_special_details 
; 
 ? 
; 
  
_diffrn_ambient_temperature       173(2) 
_diffrn_radiation_wavelength      0.71073 
_diffrn_radiation_type            MoK\a 
_diffrn_radiation_source          'fine-focus sealed tube' 
_diffrn_radiation_monochromator   graphite 
_diffrn_measurement_device_type   'CCD area detector' 
_diffrn_measurement_method        'phi and omega scans' 
_diffrn_detector_area_resol_mean  ? 
_diffrn_standards_number          ? 
_diffrn_standards_interval_count  ? 
_diffrn_standards_interval_time   ? 
_diffrn_standards_decay_%         ? 
_diffrn_reflns_number             17832 
_diffrn_reflns_av_R_equivalents   0.0451 
_diffrn_reflns_av_sigmaI/netI     0.0437 
_diffrn_reflns_limit_h_min        -18 
_diffrn_reflns_limit_h_max        18 
_diffrn_reflns_limit_k_min        -20 
_diffrn_reflns_limit_k_max        21 
_diffrn_reflns_limit_l_min        -37 
_diffrn_reflns_limit_l_max        36 
_diffrn_reflns_theta_min          1.44 
_diffrn_reflns_theta_max          28.27 
_reflns_number_total              4394 
_reflns_number_gt                 3949 
_reflns_threshold_expression      >2sigma(I) 
  
_computing_data_collection        'Bruker SMART' 
_computing_cell_refinement        'Bruker SMART' 
_computing_data_reduction         'Bruker SHELXTL' 
_computing_structure_solution     'SHELXS-97 (Sheldrick, 1990)' 
_computing_structure_refinement   'SHELXL-97 (Sheldrick, 1997)' 
_computing_molecular_graphics     'Bruker SHELXTL' 
_computing_publication_material   'Bruker SHELXTL' 
  
_refine_special_details 
; 
 Refinement of F^2^ against ALL reflections.  The weighted R-factor wR and 
 goodness of fit S are based on F^2^, conventional R-factors R are based 
 on F, with F set to zero for negative F^2^. The threshold expression of 
 F^2^ > 2sigma(F^2^) is used only for calculating R-factors(gt) etc. and is 
 not relevant to the choice of reflections for refinement.  R-factors based 
 on F^2^ are statistically about twice as large as those based on F, and R- 
 factors based on ALL data will be even larger. 
; 
  
_refine_ls_structure_factor_coef  Fsqd 
_refine_ls_matrix_type            full 
_refine_ls_weighting_scheme       calc 
_refine_ls_weighting_details 
 'calc w=1/[\s^2^(Fo^2^)+(0.0233P)^2^+64.3160P] where P=(Fo^2^+2Fc^2^)/3' 
_atom_sites_solution_primary      direct 
_atom_sites_solution_secondary    difmap 
_atom_sites_solution_hydrogens    geom 
_refine_ls_hydrogen_treatment     mixed 
_refine_ls_extinction_method      none 
_refine_ls_extinction_coef        ? 
_refine_ls_abs_structure_details 
 'Flack H D (1983), Acta Cryst. A39, 876-881' 
_refine_ls_abs_structure_Flack    0.08(3) 
_refine_ls_number_reflns          4394 
_refine_ls_number_parameters      231 
_refine_ls_number_restraints      1 
_refine_ls_R_factor_all           0.0626 
_refine_ls_R_factor_gt            0.0521 
_refine_ls_wR_factor_ref          0.1124 
_refine_ls_wR_factor_gt           0.1055 
_refine_ls_goodness_of_fit_ref    1.120 
_refine_ls_restrained_S_all       1.121 
_refine_ls_shift/su_max           0.001 
_refine_ls_shift/su_mean          0.000 
  
loop_ 
 _atom_site_label 
 _atom_site_type_symbol 
 _atom_site_fract_x 
 _atom_site_fract_y 
 _atom_site_fract_z 
 _atom_site_U_iso_or_equiv 
 _atom_site_adp_type 
 _atom_site_occupancy 
 _atom_site_symmetry_multiplicity 
 _atom_site_calc_flag 
 _atom_site_refinement_flags 
 _atom_site_disorder_assembly 
 _atom_site_disorder_group 
Ni1 Ni 0.93347(5) 0.57274(4) 0.21341(2) 0.02384(16) Uani 1 1 d . . . 
Ni2 Ni 0.52333(4) 0.40569(4) 0.03689(2) 0.02135(16) Uani 1 1 d . . . 
N1 N 0.9109(3) 0.5427(3) 0.14590(14) 0.0255(11) Uani 1 1 d . . . 
N2 N 0.5579(3) 0.4231(3) 0.10380(14) 0.0252(10) Uani 1 1 d . . . 
O1 O 0.9377(3) 0.4460(2) 0.21701(13) 0.0255(8) Uani 1 1 d . . . 
O2 O 0.8035(3) 0.5728(4) 0.22116(15) 0.0419(12) Uani 1 1 d D . . 
O3 O 0.5809(2) 0.5183(2) 0.03229(11) 0.0201(7) Uani 1 1 d . . . 
O4 O 0.6323(3) 0.3378(3) 0.02579(15) 0.0373(11) Uani 1 1 d . . . 
Cl1 Cl 0.94295(13) 0.71844(9) 0.20575(5) 0.0423(4) Uani 1 1 d . . . 
Cl2 Cl 0.44598(10) 0.28151(9) 0.04434(5) 0.0347(3) Uani 1 1 d . . . 
C1 C 0.8889(4) 0.4631(4) 0.14073(18) 0.0242(12) Uani 1 1 d . . . 
C2 C 0.8682(4) 0.4308(4) 0.09870(18) 0.0313(13) Uani 1 1 d . . . 
H2A H 0.8538 0.3740 0.0956 0.035(19) Uiso 1 1 calc R . . 
C3 C 0.8688(4) 0.4827(4) 0.0615(2) 0.0342(15) Uani 1 1 d . . . 
H3A H 0.8540 0.4622 0.0324 0.06(2) Uiso 1 1 calc R . . 
C4 C 0.8911(4) 0.5648(4) 0.06677(19) 0.0352(15) Uani 1 1 d . . . 
H4A H 0.8926 0.6013 0.0415 0.039(18) Uiso 1 1 calc R . . 
C5 C 0.9113(4) 0.5928(4) 0.11030(17) 0.0309(14) Uani 1 1 d . . . 
H5A H 0.9257 0.6494 0.1145 0.026(16) Uiso 1 1 calc R . . 
C6 C 0.8866(4) 0.4106(4) 0.18346(18) 0.0313(14) Uani 1 1 d . . . 
H6A H 0.8290 0.4070 0.1948 0.022(16) Uiso 1 1 calc R . . 
H6B H 0.9059 0.3538 0.1765 0.05(2) Uiso 1 1 calc R . . 
C7 C 0.7425(13) 0.6399(13) 0.2261(8) 0.222(10) Uiso 1 1 d D . . 
H7A H 0.6866 0.6164 0.2272 0.333 Uiso 1 1 calc R . . 
H7B H 0.7468 0.6777 0.2001 0.333 Uiso 1 1 calc R . . 
H7C H 0.7535 0.6705 0.2542 0.333 Uiso 1 1 calc R . . 
C8 C 0.6201(4) 0.4781(4) 0.1077(2) 0.0255(12) Uani 1 1 d . . . 
C9 C 0.6585(4) 0.4935(5) 0.1485(2) 0.0363(15) Uani 1 1 d . . . 
H9A H 0.7019 0.5331 0.1504 0.044 Uiso 1 1 calc R . . 
C10 C 0.6332(5) 0.4506(5) 0.1865(2) 0.0410(17) Uani 1 1 d . . . 
H10A H 0.6597 0.4592 0.2148 0.049 Uiso 1 1 calc R . . 
C11 C 0.5678(5) 0.3941(5) 0.1826(2) 0.0416(17) Uani 1 1 d . . . 
H11A H 0.5484 0.3645 0.2083 0.050 Uiso 1 1 calc R . . 
C12 C 0.5322(4) 0.3822(4) 0.14067(18) 0.0326(14) Uani 1 1 d . . . 
H12A H 0.4880 0.3437 0.1378 0.039 Uiso 1 1 calc R . . 
C13 C 0.6447(4) 0.5237(4) 0.06477(18) 0.0285(13) Uani 1 1 d . . . 
H13A H 0.6557 0.5827 0.0719 0.034 Uiso 1 1 calc R . . 
H13B H 0.6961 0.4993 0.0523 0.034 Uiso 1 1 calc R . . 
C14 C 0.6804(5) 0.2909(5) 0.0557(3) 0.058(2) Uani 1 1 d . . . 
H14A H 0.7277 0.2674 0.0394 0.087 Uiso 1 1 calc R . . 
H14B H 0.6467 0.2460 0.0684 0.087 Uiso 1 1 calc R . . 
H14C H 0.7004 0.3265 0.0803 0.087 Uiso 1 1 calc R . . 
O1S O 0.7376(15) 0.7333(18) 0.1432(8) 0.168(10) Uiso 0.50 1 d P . . 
H2O H 0.810(7) 0.529(7) 0.240(3) 0.09(4) Uiso 1 1 d . . . 
H4O H 0.652(5) 0.366(5) 0.005(2) 0.04(2) Uiso 1 1 d . . . 
  
loop_ 
 _atom_site_aniso_label 
 _atom_site_aniso_U_11 
 _atom_site_aniso_U_22 
 _atom_site_aniso_U_33 
 _atom_site_aniso_U_23 
 _atom_site_aniso_U_13 
 _atom_site_aniso_U_12 
Ni1 0.0315(4) 0.0221(4) 0.0179(3) -0.0003(3) -0.0033(3) 0.0016(3) 
Ni2 0.0237(4) 0.0221(4) 0.0182(3) 0.0016(3) -0.0027(3) -0.0010(3) 
N1 0.034(3) 0.027(3) 0.0157(19) 0.0013(17) -0.0027(19) 0.000(2) 
N2 0.024(2) 0.035(3) 0.0168(19) 0.001(2) -0.0031(17) -0.008(2) 
O1 0.029(2) 0.028(2) 0.0200(17) 0.0003(16) -0.0036(16) -0.0015(17) 
O2 0.040(3) 0.051(3) 0.035(2) -0.001(2) -0.014(2) 0.017(2) 
O3 0.0215(19) 0.0203(18) 0.0186(16) 0.0000(14) -0.0016(14) 0.0014(16) 
O4 0.037(3) 0.042(3) 0.033(2) 0.016(2) 0.006(2) 0.016(2) 
Cl1 0.0699(12) 0.0236(7) 0.0334(7) -0.0006(6) -0.0102(8) 0.0052(7) 
Cl2 0.0447(9) 0.0264(7) 0.0330(7) 0.0051(6) -0.0058(7) -0.0054(6) 
C1 0.026(3) 0.027(3) 0.019(3) -0.003(2) -0.005(2) -0.003(2) 
C2 0.040(4) 0.032(3) 0.023(3) -0.005(2) -0.006(2) -0.008(3) 
C3 0.042(4) 0.043(4) 0.018(3) -0.002(2) -0.009(3) -0.001(3) 
C4 0.049(4) 0.035(3) 0.021(3) 0.009(2) -0.008(3) 0.000(3) 
C5 0.042(4) 0.029(3) 0.021(2) 0.003(2) -0.005(2) 0.000(3) 
C6 0.039(4) 0.031(3) 0.024(3) 0.000(2) -0.011(2) -0.007(3) 
C8 0.022(3) 0.028(3) 0.027(3) 0.003(2) -0.003(2) -0.007(2) 
C9 0.032(4) 0.047(4) 0.030(3) -0.003(3) -0.008(3) -0.013(3) 
C10 0.047(4) 0.048(4) 0.028(3) 0.006(3) -0.011(3) -0.010(3) 
C11 0.044(4) 0.058(5) 0.023(3) 0.010(3) -0.004(3) -0.015(4) 
C12 0.037(4) 0.034(3) 0.026(3) 0.008(2) 0.005(3) -0.011(3) 
C13 0.023(3) 0.040(4) 0.023(3) 0.005(2) -0.005(2) -0.003(3) 
C14 0.044(5) 0.058(5) 0.072(6) 0.028(4) -0.011(4) 0.012(4) 
  
_geom_special_details 
; 
 All esds (except the esd in the dihedral angle between two l.s. planes) 
 are estimated using the full covariance matrix.  The cell esds are taken 
 into account individually in the estimation of esds in distances, angles 
 and torsion angles; correlations between esds in cell parameters are only 
 used when they are defined by crystal symmetry.  An approximate (isotropic) 
 treatment of cell esds is used for estimating esds involving l.s. planes. 
; 
  
loop_ 
 _geom_bond_atom_site_label_1 
 _geom_bond_atom_site_label_2 
 _geom_bond_distance 
 _geom_bond_site_symmetry_2 
 _geom_bond_publ_flag 
Ni1 O1 2.049(4) . ? 
Ni1 O1 2.067(4) 11_565 ? 
Ni1 N1 2.080(4) . ? 
Ni1 O1 2.105(4) 2_765 ? 
Ni1 O2 2.111(5) . ? 
Ni1 Cl1 2.3677(17) . ? 
Ni2 O3 2.046(4) . ? 
Ni2 O3 2.052(3) 3_565 ? 
Ni2 N2 2.068(4) . ? 
Ni2 O3 2.087(4) 2_665 ? 
Ni2 O4 2.098(4) . ? 
Ni2 Cl2 2.3716(16) . ? 
N1 C5 1.324(7) . ? 
N1 C1 1.342(7) . ? 
N2 C12 1.337(7) . ? 
N2 C8 1.346(7) . ? 
O1 C6 1.409(6) . ? 
O1 Ni1 2.067(4) 12_645 ? 
O1 Ni1 2.105(4) 2_765 ? 
O2 C7 1.471(15) . ? 
O2 H2O 0.91(11) . ? 
O3 C13 1.408(6) . ? 
O3 Ni2 2.052(3) 4_655 ? 
O3 Ni2 2.087(4) 2_665 ? 
O4 C14 1.397(8) . ? 
O4 H4O 0.83(7) . ? 
C1 C2 1.385(7) . ? 
C1 C6 1.518(8) . ? 
C2 C3 1.381(8) . ? 
C2 H2A 0.9500 . ? 
C3 C4 1.381(9) . ? 
C3 H3A 0.9500 . ? 
C4 C5 1.399(8) . ? 
C4 H4A 0.9500 . ? 
C5 H5A 0.9500 . ? 
C6 H6A 0.9900 . ? 
C6 H6B 0.9900 . ? 
C7 H7A 0.9800 . ? 
C7 H7B 0.9800 . ? 
C7 H7C 0.9800 . ? 
C8 C9 1.375(8) . ? 
C8 C13 1.517(8) . ? 
C9 C10 1.378(9) . ? 
C9 H9A 0.9500 . ? 
C10 C11 1.400(9) . ? 
C10 H10A 0.9500 . ? 
C11 C12 1.375(8) . ? 
C11 H11A 0.9500 . ? 
C12 H12A 0.9500 . ? 
C13 H13A 0.9900 . ? 
C13 H13B 0.9900 . ? 
C14 H14A 0.9800 . ? 
C14 H14B 0.9800 . ? 
C14 H14C 0.9800 . ? 
O1S O1S 1.20(4) 14_464 ? 
  
loop_ 
 _geom_angle_atom_site_label_1 
 _geom_angle_atom_site_label_2 
 _geom_angle_atom_site_label_3 
 _geom_angle 
 _geom_angle_site_symmetry_1 
 _geom_angle_site_symmetry_3 
 _geom_angle_publ_flag 
O1 Ni1 O1 82.20(17) . 11_565 ? 
O1 Ni1 N1 79.79(17) . . ? 
O1 Ni1 N1 161.27(18) 11_565 . ? 
O1 Ni1 O1 79.69(17) . 2_765 ? 
O1 Ni1 O1 80.87(16) 11_565 2_765 ? 
N1 Ni1 O1 100.82(18) . 2_765 ? 
O1 Ni1 O2 91.6(2) . . ? 
O1 Ni1 O2 89.44(17) 11_565 . ? 
N1 Ni1 O2 85.97(19) . . ? 
O1 Ni1 O2 167.73(17) 2_765 . ? 
O1 Ni1 Cl1 173.87(13) . . ? 
O1 Ni1 Cl1 99.72(12) 11_565 . ? 
N1 Ni1 Cl1 98.72(14) . . ? 
O1 Ni1 Cl1 94.81(12) 2_765 . ? 
O2 Ni1 Cl1 94.23(16) . . ? 
O3 Ni2 O3 81.86(15) . 3_565 ? 
O3 Ni2 N2 79.64(17) . . ? 
O3 Ni2 N2 160.68(17) 3_565 . ? 
O3 Ni2 O3 80.76(15) . 2_665 ? 
O3 Ni2 O3 80.87(14) 3_565 2_665 ? 
N2 Ni2 O3 101.51(18) . 2_665 ? 
O3 Ni2 O4 94.19(18) . . ? 
O3 Ni2 O4 86.19(16) 3_565 . ? 
N2 Ni2 O4 89.63(19) . . ? 
O3 Ni2 O4 166.64(15) 2_665 . ? 
O3 Ni2 Cl2 174.95(12) . . ? 
O3 Ni2 Cl2 99.22(11) 3_565 . ? 
N2 Ni2 Cl2 99.70(15) . . ? 
O3 Ni2 Cl2 94.51(11) 2_665 . ? 
O4 Ni2 Cl2 90.81(15) . . ? 
C5 N1 C1 119.7(5) . . ? 
C5 N1 Ni1 127.9(4) . . ? 
C1 N1 Ni1 112.2(3) . . ? 
C12 N2 C8 119.2(5) . . ? 
C12 N2 Ni2 128.6(4) . . ? 
C8 N2 Ni2 111.9(4) . . ? 
C6 O1 Ni1 110.4(3) . . ? 
C6 O1 Ni1 127.5(4) . 12_645 ? 
Ni1 O1 Ni1 98.43(17) . 12_645 ? 
C6 O1 Ni1 119.0(4) . 2_765 ? 
Ni1 O1 Ni1 100.00(17) . 2_765 ? 
Ni1 O1 Ni1 96.67(16) 12_645 2_765 ? 
C7 O2 Ni1 132.6(10) . . ? 
C7 O2 H2O 126(7) . . ? 
Ni1 O2 H2O 87(7) . . ? 
C13 O3 Ni2 110.0(3) . . ? 
C13 O3 Ni2 126.5(3) . 4_655 ? 
Ni2 O3 Ni2 98.58(15) . 4_655 ? 
C13 O3 Ni2 120.6(3) . 2_665 ? 
Ni2 O3 Ni2 98.74(15) . 2_665 ? 
Ni2 O3 Ni2 97.25(15) 4_655 2_665 ? 
C14 O4 Ni2 130.6(5) . . ? 
C14 O4 H4O 123(5) . . ? 
Ni2 O4 H4O 99(5) . . ? 
N1 C1 C2 121.7(5) . . ? 
N1 C1 C6 116.5(5) . . ? 
C2 C1 C6 121.7(5) . . ? 
C3 C2 C1 118.7(6) . . ? 
C3 C2 H2A 120.6 . . ? 
C1 C2 H2A 120.6 . . ? 
C4 C3 C2 119.6(5) . . ? 
C4 C3 H3A 120.2 . . ? 
C2 C3 H3A 120.2 . . ? 
C3 C4 C5 118.3(5) . . ? 
C3 C4 H4A 120.8 . . ? 
C5 C4 H4A 120.8 . . ? 
N1 C5 C4 121.9(6) . . ? 
N1 C5 H5A 119.1 . . ? 
C4 C5 H5A 119.1 . . ? 
O1 C6 C1 109.9(5) . . ? 
O1 C6 H6A 109.7 . . ? 
C1 C6 H6A 109.7 . . ? 
O1 C6 H6B 109.7 . . ? 
C1 C6 H6B 109.7 . . ? 
H6A C6 H6B 108.2 . . ? 
O2 C7 H7A 109.5 . . ? 
O2 C7 H7B 109.5 . . ? 
H7A C7 H7B 109.5 . . ? 
O2 C7 H7C 109.5 . . ? 
H7A C7 H7C 109.5 . . ? 
H7B C7 H7C 109.5 . . ? 
N2 C8 C9 122.0(5) . . ? 
N2 C8 C13 116.4(5) . . ? 
C9 C8 C13 121.6(5) . . ? 
C8 C9 C10 119.0(6) . . ? 
C8 C9 H9A 120.5 . . ? 
C10 C9 H9A 120.5 . . ? 
C9 C10 C11 119.0(6) . . ? 
C9 C10 H10A 120.5 . . ? 
C11 C10 H10A 120.5 . . ? 
C12 C11 C10 118.6(6) . . ? 
C12 C11 H11A 120.7 . . ? 
C10 C11 H11A 120.7 . . ? 
N2 C12 C11 122.1(6) . . ? 
N2 C12 H12A 118.9 . . ? 
C11 C12 H12A 118.9 . . ? 
O3 C13 C8 110.2(5) . . ? 
O3 C13 H13A 109.6 . . ? 
C8 C13 H13A 109.6 . . ? 
O3 C13 H13B 109.6 . . ? 
C8 C13 H13B 109.6 . . ? 
H13A C13 H13B 108.1 . . ? 
O4 C14 H14A 109.5 . . ? 
O4 C14 H14B 109.5 . . ? 
H14A C14 H14B 109.5 . . ? 
O4 C14 H14C 109.5 . . ? 
H14A C14 H14C 109.5 . . ? 
H14B C14 H14C 109.5 . . ? 
  
loop_ 
 _geom_hbond_atom_site_label_D 
 _geom_hbond_atom_site_label_H 
 _geom_hbond_atom_site_label_A 
 _geom_hbond_distance_DH 
 _geom_hbond_distance_HA 
 _geom_hbond_distance_DA 
 _geom_hbond_angle_DHA 
 _geom_hbond_site_symmetry_A 
O2 H2O Cl1  0.91(11) 2.16(11) 3.026(6) 159(10) 12_645 
O4 H4O Cl2  0.83(7) 2.22(7) 3.043(5) 173(7) 4_655 
  
_diffrn_measured_fraction_theta_max    0.979 
_diffrn_reflns_theta_full              28.27 
_diffrn_measured_fraction_theta_full   0.979 
_refine_diff_density_max    1.431 
_refine_diff_density_min   -0.855 
_refine_diff_density_rms    0.118 
